# Supplementary material for: FLT4 Mutations Are Associated with Segmental Lymphatic Dysfunction and Initial Lymphatic Aplasia in Patients with Milroy Disease
Source: MDPI journal article supplement (doi:10.3390/genes12101611), 2021-10-13
Supplement: s1 [file s1]

Article

# FLT4 Mutations Are Associated with Segmental Lymphatic Dysfunction and Initial Lymphatic Aplasia in Patients with Milroy Disease

Ningfei Liu \* and Minzhe Gao

Department of Plastic & Reconstructive Surgery, Shanghai Ninth People's Hospital, Shanghai Jiao Tong University School of Medicine, Shanghai, 200011, China

\*Correspondence: liuningfei@126.com; Tel.: +86-21-23271699 (ext. 5734); Fax: +86-21-53078128

## Supplementary Materials

**Table S1.** FLT4 Variants annotation result.

| (NM_182925) | cDNA                         | Protein | Intervar          | detail                                                                                                               |
|-------------|------------------------------|---------|-------------------|----------------------------------------------------------------------------------------------------------------------|
| 2           | c.137G>A                     | p.S46N  | VUS               | PVS1=0 PS=[0, 0, 0, 0, 0] PM=[0, 1, 0, 0, 0, 0] PP=[0, 0, 0, 1, 0, 0] BA1=0 BS=[0, 0, 0, 0, 0] BP=[0, 0, 0, 0, 0, 0] |
| 9           | c.1258+6_1258+10delTCAG<br>G | -       | VUS               | PVS1=0 PS=[0, 0, 0, 0, 0] PM=[0, 1, 0, 0, 0, 0] PP=[0, 0, 0, 1, 0, 0] BA1=0 BS=[0, 0, 0, 0, 0] BP=[0, 0, 0, 0, 0, 0] |
| 10          | c.1289C>T                    | p.S430F | VUS               | PVS1=0 PS=[0, 0, 0, 0, 0] PM=[0, 1, 0, 0, 0, 0] PP=[0, 0, 1, 1, 0, 0] BA1=0 BS=[0, 0, 0, 0, 0] BP=[0, 0, 0, 0, 0, 0] |
| 17          | c.2515G>C                    | p.E839Q | Likely pathogenic | PVS1=0 PS=[0, 0, 0, 0, 0] PM=[1, 1, 0, 0, 0, 0] PP=[0, 0, 1, 1, 0, 0] BA1=0 BS=[0, 0, 0, 0, 0] BP=[0, 0, 0, 0, 0, 0] |
| 17          | c.2531G>C                    | p.R844P | Likely pathogenic | PVS1=0 PS=[0, 0, 0, 0, 0] PM=[1, 1, 0, 0, 0, 0] PP=[0, 0, 1, 1, 1, 0] BA1=0 BS=[0, 0, 0, 0, 0] BP=[0, 0, 0, 0, 0, 0] |
| 18          | c.2546G>A                    | p.R849K | VUS               | PVS1=0 PS=[0, 0, 0, 0, 0] PM=[0, 1, 0, 0, 0, 0] PP=[0, 0, 0, 1, 0, 0] BA1=0 BS=[0, 1, 0, 0, 0] BP=[0, 0, 0, 0, 0, 0] |
| 18          | c.2554G>T                    | p.G852C | Likely pathogenic | PVS1=0 PS=[0, 0, 0, 0, 0] PM=[1, 1, 0, 0, 0, 0] PP=[0, 0, 1, 1, 1, 0] BA1=0 BS=[0, 0, 0, 0, 0] BP=[0, 0, 0, 0, 0, 0] |
| 18          | c.2587T>C                    | p.S863P | Likely pathogenic | PVS1=0 PS=[0, 0, 0, 0, 0] PM=[1, 1, 0, 0, 0, 0] PP=[0, 0, 1, 1, 1, 0] BA1=0 BS=[0, 0, 0, 0, 0] BP=[0, 0, 0, 0, 0, 0] |
| 18          | c.2615G>A                    | p.S872N | Likely pathogenic | PVS1=0 PS=[0, 0, 0, 0, 0] PM=[1, 1, 0, 0, 0, 0] PP=[0, 0, 1, 1, 0, 0] BA1=0 BS=[0, 0, 0, 0, 0] BP=[0, 0, 0, 0, 0, 0] |
| 18          | c.2632G>A                    | p.V878M | Likely pathogenic | PVS1=0 PS=[0, 0, 0, 0, 0] PM=[1, 1, 0, 0, 0, 0] PP=[0, 0, 1, 1, 1, 0] BA1=0 BS=[0, 0, 0, 0, 0] BP=[0, 0, 0, 0, 0, 0] |
| 19          | c.2740G>C                    | p.G914R | Likely pathogenic | PVS1=0 PS=[0, 0, 0, 0, 0] PM=[1, 1, 0, 0, 0, 0] PP=[0, 0, 1, 1, 0, 0] BA1=0 BS=[0, 0, 0, 0, 0] BP=[0, 0, 0, 0, 0, 0] |
| 20          | c.2771T>C                    | p.M924T | VUS               | PVS1=0 PS=[0, 0, 0, 0, 0] PM=[0, 1, 0, 0, 0, 0] PP=[0, 0, 1, 1, 0, 0] BA1=0 BS=[0, 0, 0, 0, 0] BP=[0, 0, 0, 0, 0, 0] |
| 20          | c.2777T>C                    | p.I926T | VUS               | PVS1=0 PS=[0, 0, 0, 0, 0] PM=[0, 1, 0, 0, 0, 0] PP=[0, 0, 1, 1, 1, 0] BA1=0 BS=[0, 0, 0, 0, 0] BP=[0, 0, 0, 0, 0, 0] |

|    |                |                |                   |                                                                                                                            |
|----|----------------|----------------|-------------------|----------------------------------------------------------------------------------------------------------------------------|
| 22 | c.3073A>T      | p.M1025L       | Likely pathogenic | PVS1=0 PS=[0, 0, 0, 0, 0] PM=[1, 1, 0, 0, 0, 0, 0] PP=[0, 0, 1, 1, 0, 0] BA1=0 BS=[0, 0, 0, 0, 0] BP=[0, 0, 0, 0, 0, 0, 0] |
| 23 | c.3111C>G      | p.D1037E       | Likely pathogenic | PVS1=0 PS=[0, 0, 0, 0, 0] PM=[1, 1, 0, 0, 0, 0, 0] PP=[0, 0, 1, 1, 0, 0] BA1=0 BS=[0, 0, 0, 0, 0] BP=[0, 0, 0, 0, 0, 0, 0] |
| 23 | c.3121C>T      | p.R1041W       | Likely pathogenic | PVS1=0 PS=[0, 0, 0, 0, 0] PM=[1, 1, 0, 0, 0, 0, 0] PP=[0, 0, 1, 1, 1, 0] BA1=0 BS=[0, 0, 0, 0, 0] BP=[0, 0, 0, 0, 0, 0, 0] |
| 23 | c.3122G>A      | p.R1041Q       | Likely pathogenic | PVS1=0 PS=[0, 0, 0, 0, 0] PM=[1, 1, 0, 0, 1, 1, 0] PP=[0, 0, 1, 1, 1, 0] BA1=0 BS=[0, 0, 0, 0, 0] BP=[0, 0, 0, 0, 0, 0, 0] |
| 23 | c.3163G>C      | p.Y1055H       | Likely pathogenic | PVS1=0 PS=[0, 0, 0, 0, 0] PM=[1, 1, 0, 0, 0, 0, 0] PP=[0, 0, 1, 1, 0, 0] BA1=0 BS=[0, 0, 0, 0, 0] BP=[0, 0, 0, 0, 0, 0, 0] |
| 23 | c.3175G>C      | p.A1059P       | Likely pathogenic | PVS1=0 PS=[0, 0, 0, 0, 0] PM=[1, 1, 0, 0, 0, 0, 0] PP=[0, 0, 1, 1, 0, 0] BA1=0 BS=[0, 0, 0, 0, 0] BP=[0, 0, 0, 0, 0, 0, 0] |
| 24 | c.3230C>T      | p.P1077L       | Likely pathogenic | PVS1=0 PS=[0, 0, 0, 0, 0] PM=[1, 1, 0, 0, 0, 0, 0] PP=[0, 0, 1, 1, 0, 0] BA1=0 BS=[0, 0, 0, 0, 0] BP=[0, 0, 0, 0, 0, 0, 0] |
| 24 | c.3233T>A      | p.L1078Q       | Likely pathogenic | PVS1=0 PS=[0, 0, 0, 0, 0] PM=[1, 1, 0, 0, 0, 0, 0] PP=[0, 0, 1, 1, 0, 0] BA1=0 BS=[0, 0, 0, 0, 0] BP=[0, 0, 0, 0, 0, 0, 0] |
| 24 | c.3295T>C      | p.S1099P       | Likely pathogenic | PVS1=0 PS=[0, 0, 0, 0, 0] PM=[1, 1, 0, 0, 0, 0, 0] PP=[0, 0, 1, 1, 0, 0] BA1=0 BS=[0, 0, 0, 0, 0] BP=[0, 0, 0, 0, 0, 0, 0] |
| 24 | c.3296C>T      | p.S1099F       | Likely pathogenic | PVS1=0 PS=[0, 0, 0, 0, 0] PM=[1, 1, 0, 0, 0, 0, 0] PP=[0, 0, 1, 1, 0, 0] BA1=0 BS=[0, 0, 0, 0, 0] BP=[0, 0, 0, 0, 0, 0, 0] |
| 24 | c.3315G>C      | p.W1105C       | VUS               | PVS1=0 PS=[0, 0, 0, 0, 0] PM=[0, 1, 0, 0, 0, 0, 0] PP=[0, 0, 1, 1, 0, 0] BA1=0 BS=[0, 0, 0, 0, 0] BP=[0, 0, 0, 0, 0, 0, 0] |
| 24 | c.3316G>C      | p.E1106Q       | Likely pathogenic | PVS1=0 PS=[0, 0, 0, 0, 0] PM=[0, 1, 0, 0, 1, 0, 0] PP=[0, 0, 1, 1, 0, 0] BA1=0 BS=[0, 0, 0, 0, 0] BP=[0, 0, 0, 0, 0, 0, 0] |
| 24 | c.3323_3325del | p.1108_1109del | Likely pathogenic | PVS1=0 PS=[0, 0, 0, 0, 0] PM=[0, 1, 0, 1, 0, 0, 0] PP=[0, 0, 0, 1, 1, 0] BA1=0 BS=[0, 0, 0, 0, 0] BP=[0, 0, 0, 0, 0, 0, 0] |
| 25 | c.3341C>T      | p.P1114L       | VUS               | PVS1=0 PS=[0, 0, 0, 0, 0] PM=[0, 1, 0, 0, 0, 0, 0] PP=[0, 0, 1, 1, 1, 0] BA1=0 BS=[0, 0, 0, 0, 0] BP=[0, 0, 0, 0, 0, 0, 0] |
| 25 | c.3410C>T      | p.P1137L       | VUS               | PVS1=0 PS=[0, 0, 0, 0, 0] PM=[0, 1, 0, 0, 0, 0, 0] PP=[0, 0, 1, 1, 1, 0] BA1=0 BS=[0, 0, 0, 0, 0] BP=[0, 0, 0, 0, 0, 0, 0] |

VUS: Variants uncertain significance.
